# Supplementary figures and images for: The non-coding Air RNA is required for silencing autosomal imprinted genes
Source: Springer Nature journal article supplement (doi:10.1038/415810a), 2002-02-01

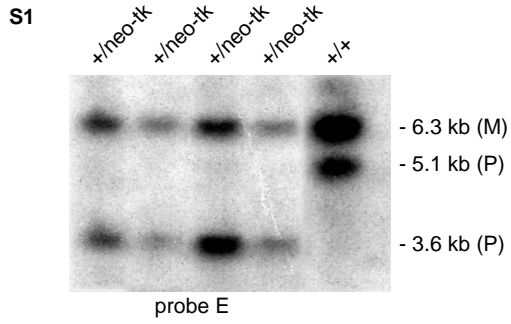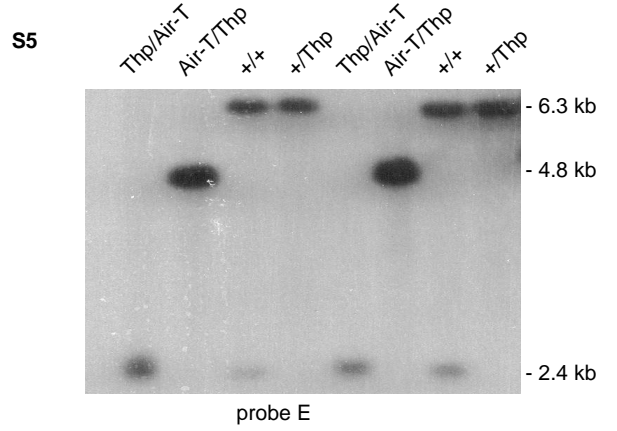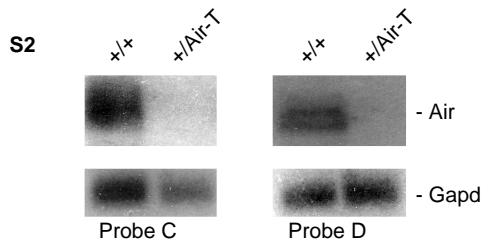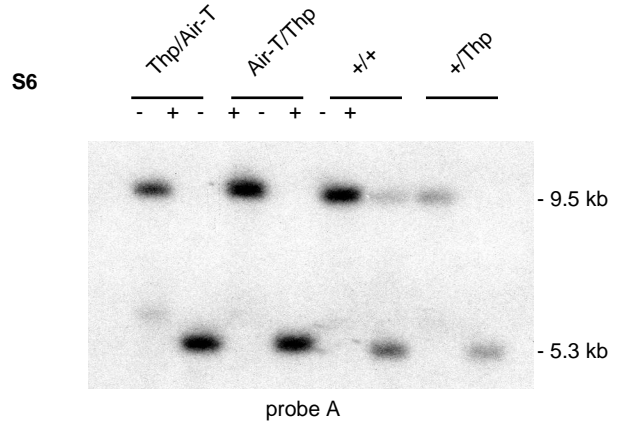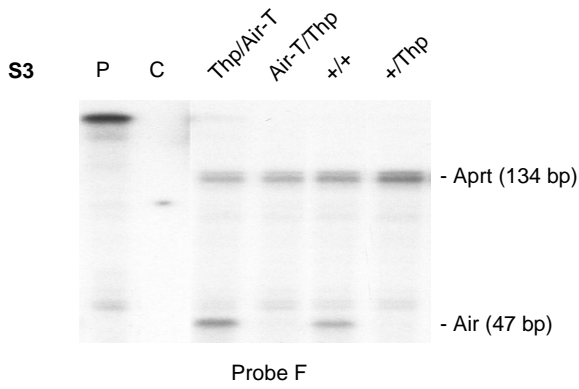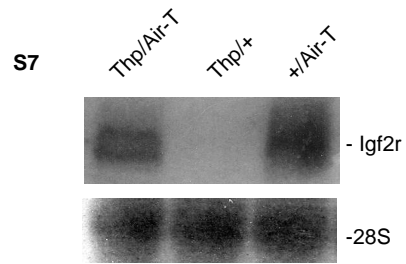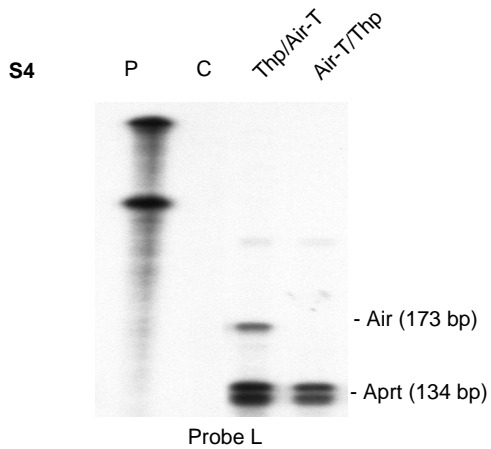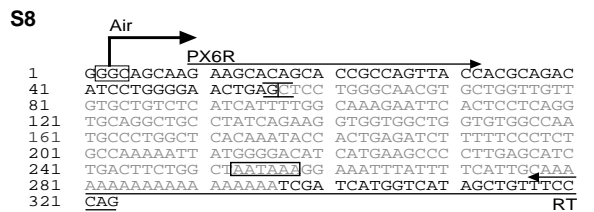

Supplement: 41586_2002_BF415810a_MOESM1_ESM.pdf [file 41586_2002_BF415810a_MOESM1_ESM.pdf]
